# Supplementary material for: Age-dependent progression from clearance to vulnerability in the early response of periventricular microglia to α-synuclein toxic species
Source: Springer Nature journal article supplement (doi:10.1186/s13024-025-00816-1), 2025-03-05
Supplement: MOESM1 [file 13024_2025_816_MOESM1_ESM.pdf]

## **Age-dependent progression from clearance to vulnerability in the response of periventricular glia to $\alpha$ -synuclein toxic species**

### **Supplementary information**

M<sup>a</sup> Salomé Sirerol-Piquer<sup>1-3\*#</sup>, Ana Perez-Villalba<sup>1-3\*\$</sup>, Pere Duart-Abadia<sup>1-3\*</sup>, Germán Belenguer<sup>1-3</sup>, Ulises Gómez-Pinedo<sup>4</sup>, Laura Blasco-Chamarro<sup>1-3</sup>, Pau Carrillo-Barberà<sup>1-3</sup>, Azucena Pérez-Cañamás<sup>2,3</sup>, Victoria Navarro-Garrido<sup>5-6</sup>, Benjamin Dehay<sup>7</sup>, Miquel Vila<sup>1,8-9</sup>, Javier Vitorica<sup>1,5-6</sup>, Francisco Pérez-Sánchez<sup>1-3</sup>, and Isabel Fariñas<sup>1-3#</sup>

<sup>1</sup>Centro de Investigación Biomédica en Red de Enfermedades Neurodegenerativas (CIBERNED), Spain.

<sup>2</sup>Departamento de Biología Celular, Biología Funcional y Antropología Física and <sup>3</sup>Instituto de Biotecnología y Biomedicina (BioTecMed), Universidad de Valencia, Burjassot, Spain.

<sup>4</sup>Laboratory of Neurobiology, Institute of Neurosciences, Hospital Clínico San Carlos Health Research Institute, Universidad Complutense de Madrid, Madrid, Spain.

<sup>5</sup>Instituto de Biomedicina de Sevilla (IBiS) and <sup>6</sup>Departamento Bioquímica y Biología Molecular, Universidad de Sevilla, Seville, Spain.

<sup>7</sup>Univ. Bordeaux, CNRS, IMN, UMR 5293, F-33000 Bordeaux, France

<sup>8</sup>Neurodegenerative Diseases Research Group, Vall d'Hebron Research Institute, Autonomous University of Barcelona, Barcelona, Spain

<sup>9</sup>Catalan Institution for Research and Advanced Studies (ICREA), Barcelona, Spain.

<sup>\$</sup>Present address: Departamento de Neuropsicobiología, Facultad de Psicología. UCV, Valencia, Spain.

\*These authors contributed equally

# Addresses for correspondence: Isabel Fariñas and M<sup>a</sup> Salomé Sirerol-Piquer.

Phones: +34-9635-43784 and 44175.

E-mails: [isabel.farinass@uv.es](mailto:isabel.farinass@uv.es) and [M.Salome.Piquer@uv.es](mailto:M.Salome.Piquer@uv.es)

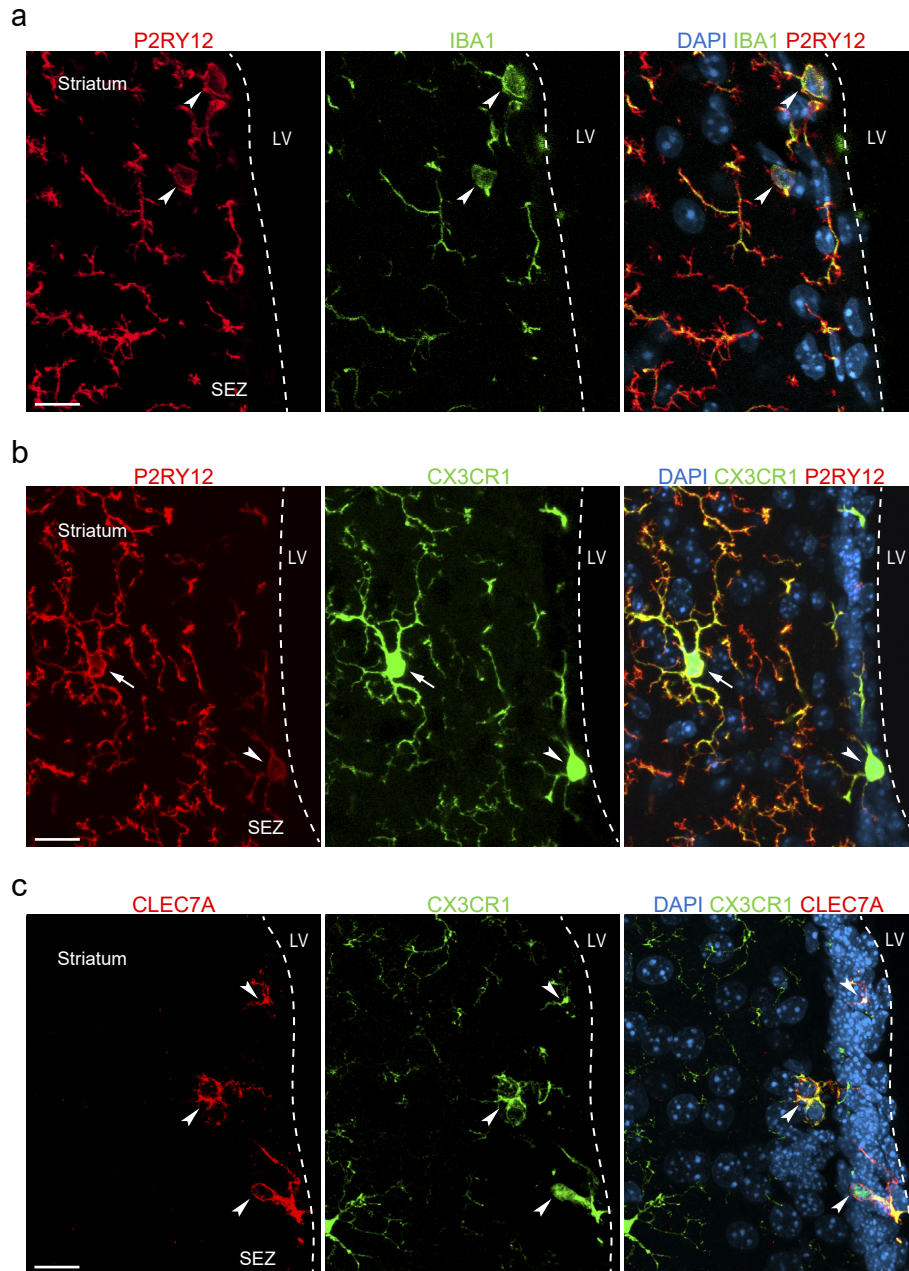

**Suppl. Fig 1. Microglial specific stainings.** **a.** Confocal images of coronal sections from the SEZ of 2-month-old mice, showing immunostainings for IBA1 (green) and P2YR12 (red). **b.** Confocal images of coronal sections from the SEZ of 2-month-old *Cx3cr1*<sup>+/GFP</sup> knockin mice showing GFP fluorescence (green, CX3CR1) and immunostaining for P2YR12 (red). **c.** Confocal images of coronal sections from the SEZ of 2-month-old *Cx3cr1*<sup>+/GFP</sup> knockin mice showing GFP fluorescence (green, CX3CR1) and immunostaining for CLEC7A (red). Microglial cells are indicated by arrows (at the striatum) and arrowheads (at the SEZ). DAPI: blue. Scale bar: 20  $\mu$ m.



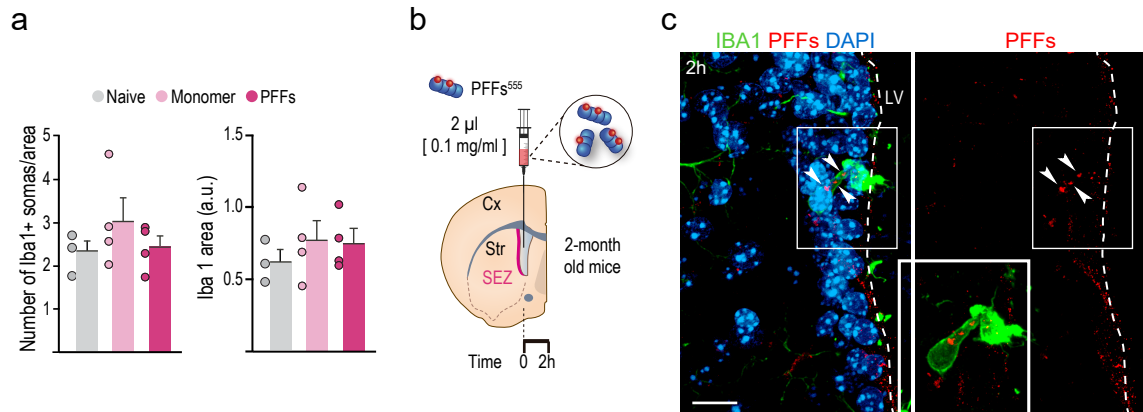

**Suppl. Fig. 2. Microglial activation and short-term microglial uptake of  $\alpha$ Syn PFFs.** **a.** Quantification of the number of somas and the area occupied by microglia 15 days after the infusion of either monomeric  $\alpha$ Syn or PFFs into the LV of 2-month-old ( $n = 4$ ) or naive mice. Data are presented as mean values  $\pm$  SEM. **b.** Schematic representation of the in vivo experiment.  $\alpha$ Syn PFFs were microinjected into the right LV and the animals were euthanized two hours afterwards. **c.** Confocal images of the SEZ showing PFFs (red) and immunostaining for IBA1 (green). Arrowheads point at PFFs inside a microglial cell. DAPI: blue. Scale bar: 20  $\mu$ m.

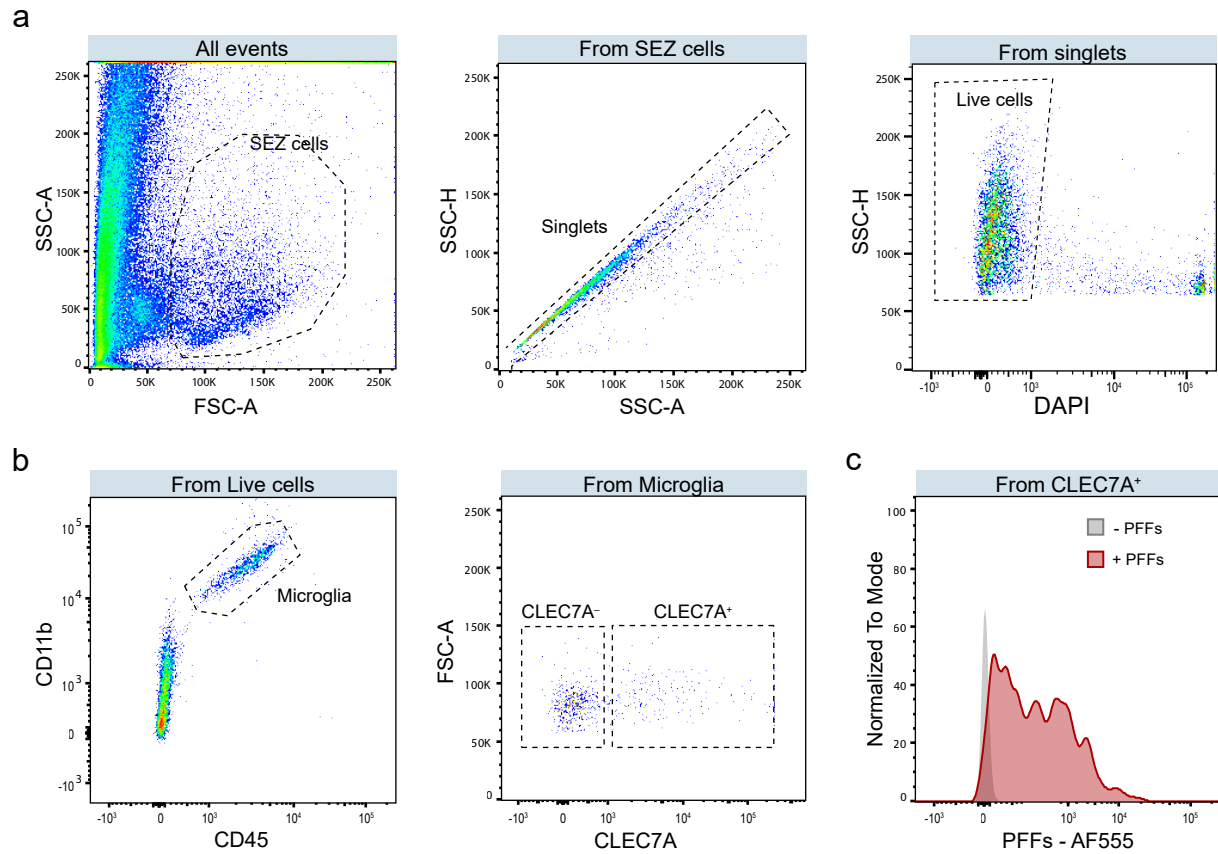

**Suppl. Fig. 3. FACS gating strategy for microglia and ex vivo PFF phagocytosis by CLEC7A<sup>+</sup> microglia.** **a.** Representative flow cytometry dot plots depict the initial steps of the gating strategy for live cell selection. **b.** Representative flow cytometry dot plot depicting the gating strategy for the selection of CLEC7A<sup>+</sup> and CLEC7A<sup>-</sup> microglia. **c.** Representative flow cytometry histogram illustrating AF555 intensity in CLEC7A<sup>+</sup> microglia incubated *ex vivo* with PFFs-AF555 (red) or PBS (grey).

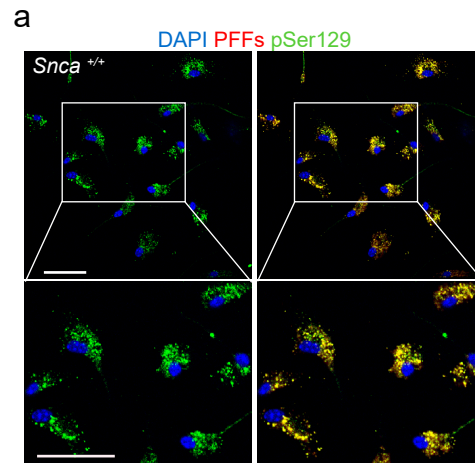

**Suppl. Fig. 4. PFFs phosphorylation in *Snca*<sup>+/+</sup> mice. a.** Detection of PFFs (red) and αSyn pSer129 (green) in *Snca*<sup>+/+</sup> mixed glial cultures. Scale bar: 40 μm.

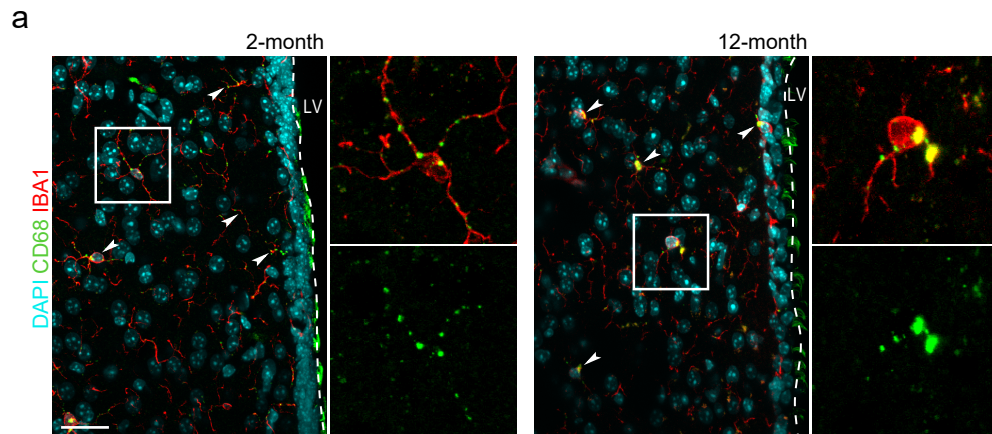

**Suppl. Fig. 5. Age-associated lysosomal changes.** a. Confocal images of the SEZ of 2- and 12-month-old mice showing immunostainings for CD68 (green) and IBA1 (red). Arrowheads point at microglial cells. DAPI: cyan. Scale bar: 30 μm.



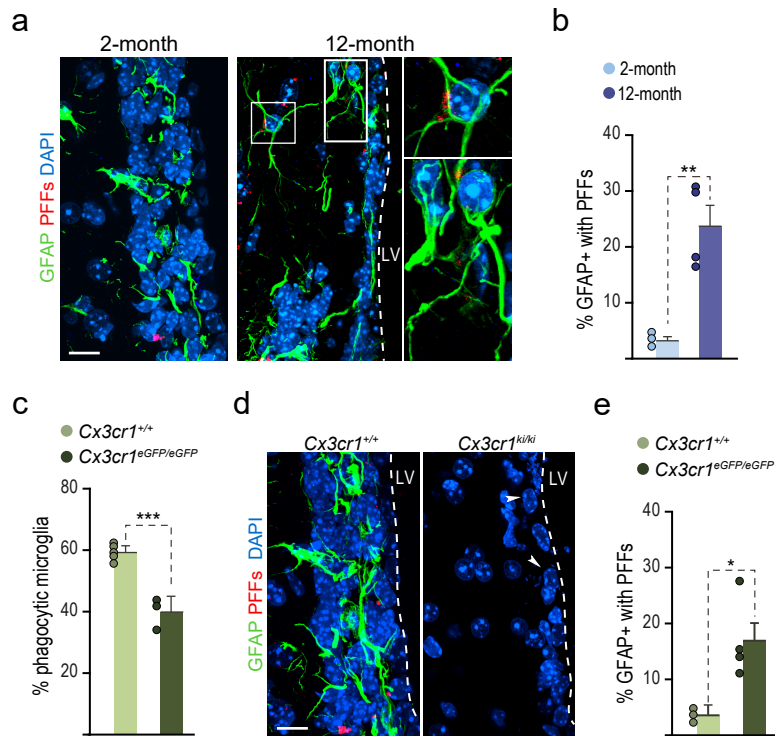

**Supp. Fig. 6. Microglial impairment is associated with increased astrocytic PFF uptake. a.** Confocal images of the SEZ of 2- and 12-month-old mice showing PFFs (red) and immunostaining for GFAP (green) 15 days after PFF infusion. **b.** Quantification of the percentage of astrocytes containing PFFs in 2- (n=3) and 12-month-old (n=4) mice. Data are presented as mean values  $\pm$  SEM; Student's t test,  $p < 0.01$ . **c.** Flow cytometry analysis of PFF phagocytic capacity in *ex vivo* experiments with microglia isolated from the SEZ of *Cx3cr1*<sup>+/+</sup> mice (n = 5) and *Cx3cr1*<sup>eGFP/eGFP</sup> mice (n=3). Data are presented as mean values  $\pm$  SEM; Student's t-test,  $p < 0.001$ . **d.** Confocal images of the SEZ showing PFFs (red) and immunostaining for GFAP (green) in 2-month-old *Cx3cr1*<sup>+/+</sup> and *Cx3cr1*<sup>eGFP/eGFP</sup> mice. **e.** Quantification of the percentage of astrocytes containing PFFs in *Cx3cr1*<sup>+/+</sup> (n=3) and *Cx3cr1*<sup>eGFP/eGFP</sup> (n=4). Data are presented as mean values  $\pm$  SEM; Student's t test,  $p < 0.05$ . DAPI: blue. Scale bar: a and d, 20  $\mu$ m.

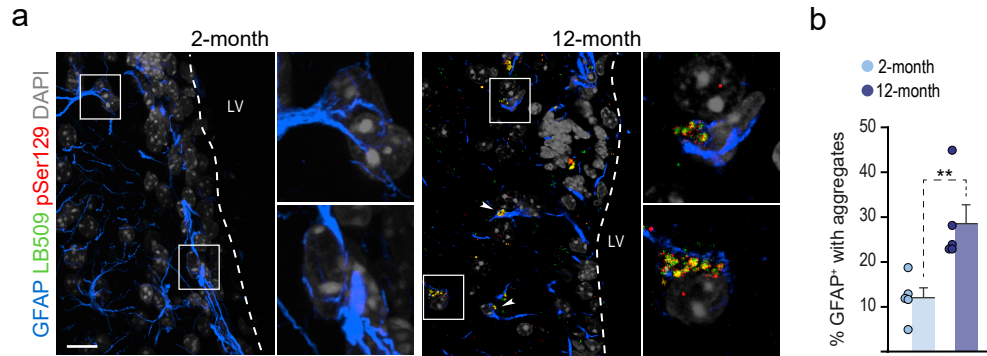

**Suppl. Fig. 7. Increased astrocytic LB uptake in aged mice.** **a.** Confocal images of the SEZ of 2- and 12-month-old mice showing immunostainings for human  $\alpha$ Syn (LB509, green), pSer129 (red), and GFAP (blue) 15 days after LB-fraction infusion. Arrowheads point at astrocytes containing LB material. **b.** Quantification of the percentage of astrocytes containing LB material in 2- (n = 5) and 12-month-old (n = 5) mice. Data are presented as mean values  $\pm$  SEM; Student's t-test,  $p < 0.01$ . DAPI: grey. Scale bar: 20  $\mu$ m.

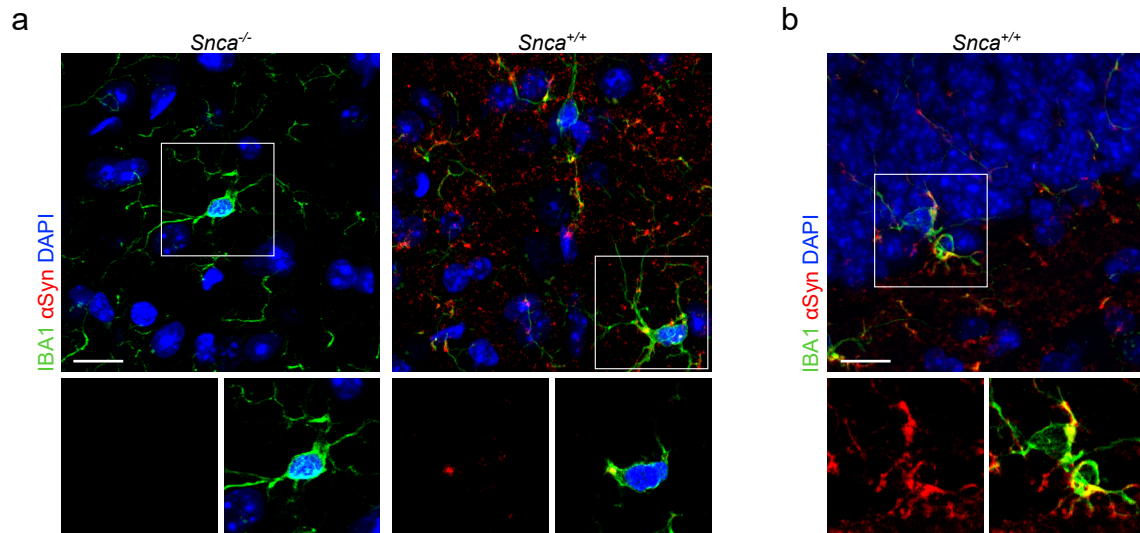

**Suppl. Fig. 8. *αSyn* expression by microglia in cortex and dentate gyrus.** **a.** Confocal images of the cerebral cortex showing immunostainings for IBA1 (green) and *αSyn* (red). *αSyn* staining in *Snca*<sup>-/-</sup> mice is used as a control of antibody specificity. **b.** Confocal images of the dentate gyrus showing immunostainings for IBA1 (green) and *αSyn* (red). DAPI: blue. Scale bar: a and b, 20  $\mu$ m.

Suppl. Fig. 9

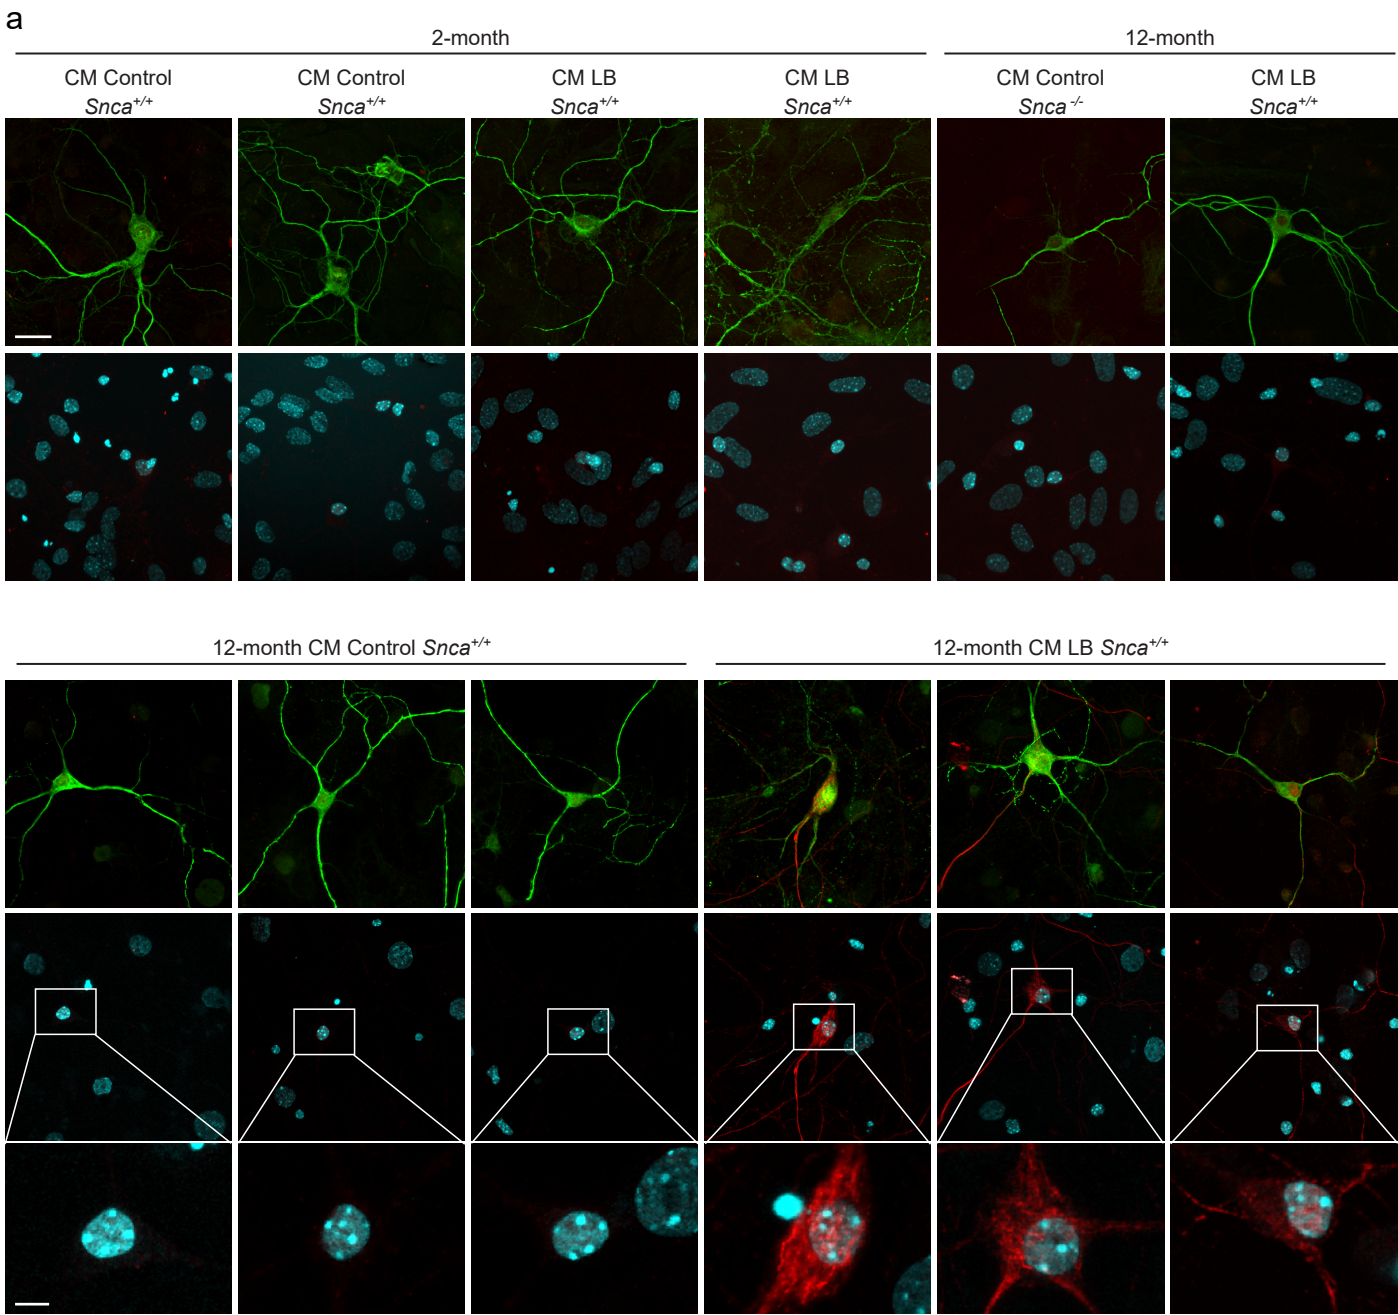

**Suppl. Fig. 9. *α*Syn prion-like effects induced by conditioned media obtained from microglia treated with LBs.** Representative fluorescence images of pSer129 (red) in hippocampal neuron (MAP2, green) cultures incubated with concentrated conditioned media (CM) obtained from mixed glial cells from 2-month *Snca*<sup>+/+</sup> mice or 12-month-old *Snca*<sup>+/+</sup> and *Snca*<sup>-/-</sup> mice treated with either PBS (control) or LBs. DAPI: cyan. Scale bars: panoramic images, 20 μm; detail images, 5 μm.



Suppl. Table 1

|             | Age | Gender | Other pathologies                                  |
|-------------|-----|--------|----------------------------------------------------|
| Controls    | 65  | male   | Hypertension, hyperlipidemia                       |
|             | 74  | male   | L4-L5 lumbar stenosis, fibromyalgia and depression |
|             | 82  | male   | Hypertension, type II diabetes                     |
| PD patients | 67  | male   | Hyperlipidemia, type II diabetes                   |
|             | 72  | male   | Arthritis, depression                              |
|             | 80  | female | Osteoporosis, depression                           |
|             | 84  | male   | Hypertension                                       |
